# Supplementary material for: Clinical and genetic diagnosis of thirteen Japanese patients with hereditary spherocytosis
Source: PubMed Central journal article supplement (PMC8755803; doi:10.1038/s41439-021-00179-1), 2022-01-12
Supplement: 41439_2021_179_MOESM1_ESM.pdf [file 41439_2021_179_MOESM1_ESM.pdf]

# Supplemental Figure S1. In-silico analysis for predicted splice site

[http://www.fruitfly.org/seq\\_tools/splice.html](http://www.fruitfly.org/seq_tools/splice.html)

Wild type

Splice site predictions for 1 sequence with donor score cutoff 0.40, acceptor score cutoff 0.40 (exon/intron boundary shown in larger font):

Donor site predictions for 10.42.3.122.160411.0 :

| Start | End | Score | Exon     | Intron   |
|-------|-----|-------|----------|----------|
| 7     | 21  | 0.77  | ccaaataG | tatgtcc  |
| 61    | 75  | 0.69  | gaatgagG | tgtgcag  |
| 251   | 265 | 0.98  | cctccagG | tgagagg  |
| 427   | 441 | 0.99  | cacagaaG | taagtac  |
| 490   | 504 | 0.66  | gcttcagG | tacacacc |

Variant

Splice site predictions for 1 sequence with donor score cutoff 0.40, acceptor score cutoff 0.40 (exon/intron boundary shown in larger font):

Donor site predictions for 10.42.0.144.160423.0 :

| Start | End | Score | Exon     | Intron   |
|-------|-----|-------|----------|----------|
| 7     | 21  | 0.77  | ccaaataG | tatgtcc  |
| 61    | 75  | 0.69  | gaatgagG | tgtgcag  |
| 251   | 265 | 0.98  | cctccagG | tgagagg  |
| 486   | 500 | 0.66  | gcttcagG | tacacacc |

In comparison with the wild type sequence, the normal splicing donor site (red rectangle) is disappeared in the variant sequence.

## Supplemental Figure S2. In-silico analysis for predicted splice site

<http://www.cbs.dtu.dk/services/NetGene2/>

Wild type

\*\*\*\*\* NetGene2 v. 2.4 \*\*\*\*\*

The sequence: sequence1 has the following composition:

Length: 780 nucleotides.

26.5% A, 20.1% C, 29.9% G, 23.5% T, 0.0% X, 50.0% G+C

Donor splice sites, direct strand

| pos | 5'→3' | phase | strand | confidence | 5'         | exon | intron     | 3' |
|-----|-------|-------|--------|------------|------------|------|------------|----|
| 258 |       | 0     | +      | 0.49       | TGTCCTCCAG |      | GTGAGAGGAC |    |
| 434 |       | 0     | +      | 0.93       | AGCCACAGAA |      | GTAAGTACCT | H  |

Variant

\*\*\*\*\* NetGene2 v. 2.4 \*\*\*\*\*

The sequence: sequence1 has the following composition:

Length: 776 nucleotides.

26.4% A, 20.2% C, 29.9% G, 23.5% T, 0.0% X, 50.1% G+C

Donor splice sites, direct strand

| pos | 5'→3' | phase | strand | confidence | 5'         | exon | intron     | 3' |
|-----|-------|-------|--------|------------|------------|------|------------|----|
| 258 |       | 0     | +      | 0.49       | TGTCCTCCAG |      | GTGAGAGGAC |    |

In comparison with the wild type sequence, the normal splicing donor site (red rectangle) is disappeared in the variant sequence.
