# Supplementary material for: Clinical and genetic diagnosis of thirteen Japanese patients with hereditary spherocytosis
Source: PubMed Central journal article supplement (PMC8755803; doi:10.1038/s41439-021-00179-1), 2022-01-12
Supplement: 41439_2021_179_MOESM2_ESM.pdf [file 41439_2021_179_MOESM2_ESM.pdf]

**Supplemental Table S1. Classification of hereditary spherocytosis in OMIM**

| MIM No. | Phenotype            | Symbol | Location | Gene          | Inheritance | Protein            |
|---------|----------------------|--------|----------|---------------|-------------|--------------------|
| #18200  | Spherocytosis type 1 | SPH1   | 8p11.21  | <i>ANK1</i>   | AD, AR      | ankyrin 1          |
| #616649 | Spherocytosis type 2 | SPH2   | 14q23.3  | <i>SPTB</i>   | AD          | $\beta$ -spectrin  |
| #270970 | Spherocytosis type 3 | SPH3   | 1q23.1   | <i>SPTA1</i>  | AR          | $\alpha$ -spectrin |
| #612653 | Spherocytosis type 4 | SPH4   | 17q21.31 | <i>SLC4A1</i> | AD          | band 3             |
| #612690 | Spherocytosis type 5 | SPH5   | 15q15.2  | <i>EPB42</i>  |             | protein 4.2        |

AD, autosomal dominant; AR, autosomal recessive
