# Supplementary material for: Clinical and genetic diagnosis of thirteen Japanese patients with hereditary spherocytosis
Source: PubMed Central journal article supplement (PMC8755803; doi:10.1038/s41439-021-00179-1), 2022-01-12
Supplement: 41439_2021_179_MOESM3_ESM.pdf [file 41439_2021_179_MOESM3_ESM.pdf]

**Supplemental Table S2. The list of the genes included in the target capture sequencing panel**

| Genes related to enzyme | Genes related to membrane | Gene related to congenital dys-erythropoietic anemia | Genes related to hemo-chromatosis | Gene related to TTP | Genes related to atypical HUS | Others        | Genes related to other phenotypes |
|-------------------------|---------------------------|------------------------------------------------------|-----------------------------------|---------------------|-------------------------------|---------------|-----------------------------------|
| <i>ADA</i>              | <i>EPB42</i>              | <i>SEC23B</i>                                        | <i>HFE</i>                        | <i>ADAMTS13</i>     | <i>C3</i>                     | <i>ATP11C</i> | <i>ADORA2B</i>                    |
| <i>ALDOA</i>            | <i>SLC4A1</i>             | <i>CDAN1</i>                                         | <i>HFE2</i>                       |                     | <i>CD46</i>                   | <i>COL4A1</i> | <i>ULK1</i>                       |
| <i>AK1</i>              | <i>SPTA1</i>              | <i>C15orf41</i>                                      | <i>HAMP</i>                       |                     | <i>CFH</i>                    | <i>PIGA</i>   | <i>BECN1</i>                      |
| <i>ENO1</i>             | <i>SPTB</i>               | <i>KLF1</i>                                          | <i>TFR2</i>                       |                     | <i>CFI</i>                    | <i>UGT1A1</i> | <i>PIK3C3</i>                     |
| <i>G6PD</i>             | <i>ANK1</i>               | <i>KIF23</i>                                         | <i>SLC40A1</i>                    |                     | <i>CFHR1</i>                  | <i>ABCG8</i>  | <i>AMBRA1</i>                     |
| <i>GPI</i>              | <i>GYPC</i>               |                                                      | <i>FTH1</i>                       |                     | <i>CFHR3</i>                  | <i>ATP7A</i>  | <i>PRKAA1</i>                     |
| <i>GPX1</i>             | <i>EPB41</i>              |                                                      |                                   |                     | <i>CFB</i>                    | <i>ATP7B</i>  | <i>ATG9A</i>                      |
| <i>GSR</i>              | <i>STOM</i>               |                                                      |                                   |                     | <i>THBD</i>                   | <i>GATA1</i>  | <i>TBC1D5</i>                     |
| <i>GSS</i>              | <i>RHAG</i>               |                                                      |                                   |                     | <i>CFHR2</i>                  |               | <i>BNIP3L</i>                     |
| <i>GCLC</i>             | <i>PIEZO1</i>             |                                                      |                                   |                     | <i>CFHR4</i>                  |               | <i>BNIP3</i>                      |
| <i>HK1</i>              | <i>SLC2A1</i>             |                                                      |                                   |                     | <i>CFHR5</i>                  |               | <i>FUNDC1</i>                     |
| <i>NT5C3A</i>           | <i>KCNN4</i>              |                                                      |                                   |                     | <i>DGKE</i>                   |               |                                   |
| <i>PKFM</i>             | <i>ABCG5</i>              |                                                      |                                   |                     | <i>PLG</i>                    |               |                                   |
| <i>PGD</i>              |                           |                                                      |                                   |                     |                               |               |                                   |
| <i>PGK1</i>             |                           |                                                      |                                   |                     |                               |               |                                   |
| <i>PKLR</i>             |                           |                                                      |                                   |                     |                               |               |                                   |
| <i>TPI1</i>             |                           |                                                      |                                   |                     |                               |               |                                   |

TTP, thrombotic thrombocytopenic purpura; HUS, hemolytic-uremic syndrome
