# Supplementary material for: Clinical and genetic diagnosis of thirteen Japanese patients with hereditary spherocytosis
Source: PubMed Central journal article supplement (PMC8755803; doi:10.1038/s41439-021-00179-1), 2022-01-12
Supplement: 41439_2021_179_MOESM4_ESM.pdf [file 41439_2021_179_MOESM4_ESM.pdf]

**Supplemental Table S3. Distribution of the disease-related variants in the different studies**

| Symbol                       | SPH1        | SPH2                  | SPH3         | SPH4          | SPH5         | Combined | Unknown | others | Total |
|------------------------------|-------------|-----------------------|--------------|---------------|--------------|----------|---------|--------|-------|
| Genes                        | <i>ANK1</i> | <i>SPTB</i>           | <i>SPTA1</i> | <i>SLC4A1</i> | <i>EPB42</i> |          |         |        |       |
| Inoue et al. 1994            | 2%          | 15% (including SPTA1) |              | 32%           | 6%           | 36%      | 9%      |        |       |
| Yawata et al. 2000           | 7%          | 0%                    | 0%           | 20%           | 45%          | 0%       | 28%     | 0%     |       |
| Nakanishi et al. 2001        | 15          | NT                    | NT           | 0             | 0            | NT       | NT      | NT     | 49    |
| Park et al., 2016            | 13          | 12                    | 0            | 0             | 0            | 0        | 0       | 0      | 25    |
| Wang et al., 2018            | 17          | 17                    | 0            | 4             | 0            | 0        | 0       | 0      | 38    |
| Lin et al., 2018             | 2           | 0                     | 1 (hetero)   | 0             | 0            | 1        | 3       | 0      | 7     |
| Russo et al., 2018           | 2           | 5                     | 4            | 5             | 0            | 4        | 26      | 28     | 74    |
| Choi et al., 2019            | 19          | 22                    | 0            | 3             | 0            | 6        | 9       | 0      | 59    |
| Xue et al., 2019             | 3           | 4                     | 0            | 2             | 0            | 0        | 0       | 1      | 10    |
| van Vuren et al., 2019       | 23          | 17                    | 31           | 13            | 1            | 0        | 10      | 0      | 95    |
| Wang et al., 2020            | 13          | 10                    | 0            | 0             | 0            | 0        | 0       | 0      | 23    |
| Mansour-Hendili et al., 2020 | 8           | 5                     | 0            | 6             | 0            | 1        | 0       | 0      | 20    |
| Xie et al., 2021             | 13          | 10                    | 2            | 3             | 0            | 0        | 0       | 0      | 28    |
| This study                   | 6           | 4                     | 1            | 1             | 1            | 0        | 0       | 0      | 13    |

NT: not tested
